# Supplementary material for: Survey of Zoonotic Diarrheagenic Protist and Hepatitis E Virus in Wild Boar (Sus scrofa) of Portugal
Source: MDPI journal article supplement (doi:10.3390/ani13020256), 2023-01-12
Supplement: s1 [file s1]

**Table S1.** Oligonucleotides used for the molecular identification and/or characterization of the microeukaryote parasites and HEV investigated in the present study.

| Target organism                       | Locus           | Oligonucleotide | Sequence (5'–3')                      | Reference |
|---------------------------------------|-----------------|-----------------|---------------------------------------|-----------|
| <i>Cryptosporidium</i> spp.           | <i>ssu</i> rRNA | CR-P1           | CAGGGAGGTAGTGACAAGAA                  | [76]      |
|                                       |                 | CR-P2           | TCAGCCTTGCGACCATACTC                  | [76]      |
|                                       |                 | CR-P3           | ATTGGAGGGCAAGTCTGGTG                  | [76]      |
|                                       |                 | CPB-DIAGR       | TAAGGTGCTGAAGGAGTAAGG                 | [76]      |
| <i>Balantioides coli</i>              | ITS             | B5D             | GAGCTTTTAACTGCAACAACG                 | [77]      |
|                                       |                 | RD5             | ATCTGGTTGATCCTGCCAGT                  | [77]      |
| <i>Giardia duodenalis</i>             | <i>ssu</i> rRNA | Probe           | FAM–<br>CCCGCGGCGGTCCCTGCTAG–<br>BHQ1 | [78]      |
|                                       |                 | Gd-80F          | GACGGCTCAGGACAACGGTT                  | [78]      |
|                                       |                 | Gd-127R         | TTGCCAGCGGTGTCCG                      | [78]      |
| <i>Blastocystis</i> sp.               | <i>ssu</i> rRNA | BhRDr           | GAGCTTTTAACTGCAACAACG                 | [79]      |
| <i>Enterocytozoon</i> <i>bieneusi</i> | ITS             | RD5             | ATCTGGTTGATCCTGCCAGT                  | [79]      |
|                                       |                 | EBITS3          | GGTCATAGGGATGAAGAG                    | [80]      |
|                                       |                 | EBITS4          | TTCGAGTTCTTTCGCGCTC                   | [80]      |
|                                       |                 | EBITS1          | GCTCTGAATATCTATGGCT                   | [80]      |
| HEV                                   | ORF1            | EBITS2.4        | ATCGCCGACGGATCCAAGTG                  | [80]      |
|                                       |                 | HEV-cs          | TCGCGCATCACMTTYTTCCARAA               | [81]      |
|                                       |                 | HEV-cas         | GCCATGTTCCAGACDGTRTTCCA               | [81]      |
|                                       |                 | HEV-csn         | TGTGCTCTGTTTGGCCNTGGTTY<br>CDG        | [81]      |
|                                       |                 | HEV-casn        | CCAGGCTCACCRGARTGYTTCTT<br>CCA        | [81]      |

ITS: Internal transcribed spacer; *ssu* rRNA: Small subunit ribosomal RNA; ORF: Open reading frame.

**Table S2.** Summary of positive samples for microeukaryote parasites and HEV from wild boar of Portugal.

| Sample ID | Sex    | Age         | <i>Cryptosporidium</i> <i>scrofarum</i> | <i>Balantioi</i> <i>des coli</i> | <i>Giardia</i> <i>duodenal</i> <i>is</i> | <i>Blastocy</i> <i>stis</i> | <i>Enterocytoz</i> <i>oon bieneusi</i> | HEV |
|-----------|--------|-------------|-----------------------------------------|----------------------------------|------------------------------------------|-----------------------------|----------------------------------------|-----|
| J76       | Female | Adult       | -                                       | -                                | -                                        | +                           | -                                      | -   |
| J92       | Female | Young Adult | -                                       | -                                | -                                        | +                           | -                                      | -   |
| J102      | Male   | Young Adult | -                                       | -                                | -                                        | +                           | -                                      | -   |
| J160      | Male   | Young       | +                                       | -                                | -                                        | -                           | -                                      | -   |
| J191      | Male   | Young       | -                                       | +                                | -                                        | -                           | -                                      | -   |
| J202      | Female | Adult       | -                                       | -                                | -                                        | +                           | -                                      | -   |
| J245      | Female | Adult       | -                                       | +                                | -                                        | -                           | -                                      | -   |

|       |        |       |   |   |   |   |   |   |
|-------|--------|-------|---|---|---|---|---|---|
| J270  | Female | Adult | - | + | - | - | - | - |
| J275  | Male   | Adult | - | + | - | - | - | + |
| J294  | Male   | Young | - | + | - | - | - | - |
| J296  | Female | Adult | - | + | - | - | - | + |
| J320  | Male   | Young | + | - | - | + | - | - |
| J368  | Female | Adult | - | + | - | - | - | - |
| J391  | Female | Young | - | - | - | + | - | - |
| J407  | Female | Adult | - | + | - | - | - | - |
| J422  | Female | Adult | - | - | - | + | - | - |
| J423  | Male   | Adult | - | - | - | + | - | - |
| J441  | Female | Adult | - | + | - | - | - | - |
| J442  | Male   | Adult | - | - | - | + | - | - |
| J454  | Female | Young | - | - | - | - | - | + |
| CV-01 | Male   | Young | - | - | - | + | - | - |
| CV-02 | Male   | Adult | - | - | - | + | - | - |
| CV-03 | Male   | Young | - | - | - | + | - | - |
| CV-04 | Male   | Young | - | - | - | + | - | - |
| CV-05 | Male   | Young | - | - | - | + | - | - |
| SA-01 | Female | Adult | - | - | - | + | - | - |
| SA-02 | Female | Young | - | + | - | + | - | - |
| PB-01 | Male   | Young | - | - | - | + | - | - |
| PB-03 | Female | Adult | - | - | - | + | - | - |
| PN-01 | Male   | Young | - | - | - | + | - | - |
| PN-02 | Female | Adult | - | - | - | + | - | - |
| PN-03 | Female | Adult | - | + | - | + | - | - |
| CJ-01 | Male   | Adult | - | - | - | + | - | - |
| SB-02 | Female | Young | - | - | - | + | - | - |
| AL-04 | Male   | Adult | - | + | - | + | - | - |
| BA-02 | Female | Young | - | - | - | + | - | - |
| BA-04 | Female | Adult | - | - | - | + | - | - |
| TL-01 | Female | Adult | - | + | - | + | - | - |
| TL-03 | Female | Young | - | + | - | + | - | - |

|       |        |       |   |   |   |   |   |   |
|-------|--------|-------|---|---|---|---|---|---|
| LB-01 | Male   | Adult | - | - | - | + | - | - |
| LB-02 | Female | Adult | - | - | - | + | - | - |
| LB-03 | Male   | Adult | - | - | - | + | - | - |
| LB-04 | Male   | Adult | - | - | - | + | - | - |
| LB-05 | Male   | Adult | - | - | - | + | - | - |
| LB-06 | Female | Young | - | - | - | - | - | + |
| LB-07 | Female | Adult | - | - | - | + | - | - |
| LB-08 | Male   | Adult | - | - | - | + | - | - |
| CB-02 | Male   | Young | - | + | - | - | - | - |
| CB-03 | Male   | Young | - | + | - | - | - | - |
| CB-04 | Female | Young | - | + | - | + | - | - |
| TR-01 | Female | Young | - | - | - | + | - | - |
| TR-02 | Male   | Adult | - | + | - | + | - | - |
| TR-03 | Female | Adult | - | + | - | + | - | - |
| TR-05 | Female | Young | - | - | - | + | - | - |
| TR-06 | Female | Adult | - | + | - | + | - | - |
| TR-09 | Female | Adult | - | + | - | + | - | - |

**Table S3.** Summary of co-infections between microeukaryote parasites and HEV and respective *p* value from wild boar of Portugal.

|                                  |          | HEV      |             | <i>p</i> -value |
|----------------------------------|----------|----------|-------------|-----------------|
|                                  |          | Positive | Negative    |                 |
| <i>Cryptosporidium scrofarum</i> | Positive | 0 (0%)   | 2 (100%)    | 0.527           |
|                                  | Negative | 4 (2.8%) | 138 (97.2%) |                 |
| <i>Balantioides coli</i>         | Positive | 2 (9.5%) | 19 (90.5%)  | 0.056           |
|                                  | Negative | 2 (1.6%) | 121 (98.4%) |                 |
| <i>Giardia duodenalis</i>        | Positive | 0 (0%)   | 0 (0%)      | -               |
|                                  | Negative | 4 (2.8%) | 140 (97.2%) |                 |
| <i>Blastocystis</i>              | Positive | 0 (0%)   | 42 (100%)   | 0.198           |
|                                  | Negative | 4 (3.9%) | 98 (96.1%)  |                 |
| <i>Enterocytozoon bieneusi</i>   | Positive | 0 (0%)   | 0 (0%)      | -               |
|                                  | Negative | 4 (2.8%) | 140 (97.2%) |                 |
